# Supplementary material for: Heterogeneous oxidation kinetics of organic biomass burning aerosol surrogates by O3, NO2, N2O5, and NO3
Source: Royal Society of Chemistry journal article supplement (doi:10.1039/c1cp22478f), 2011-01-01
Supplement: c1cp22478f.pdf [file c1cp22478f.pdf]

# TEST
